# Supplementary material for: Influence of the lattice constant on defects in cerium oxide
Source: Royal Society of Chemistry journal article supplement (doi:10.1039/c8cp03677b), 2018-01-01
Supplement: c8cp03677b1.pdf [file c8cp03677b1.pdf]

Electronic Supplementary Information

## Influence of the lattice constant on defects in cerium oxide

Steffen Grieshammer

Helmholtz-Institut Münster (IEK-12), Forschungszentrum Jülich GmbH, Corrensstraße 46, 48149 Münster,  
Germany

Institute of Physical Chemistry, RWTH Aachen University, Landoltweg 2, 52056 Aachen, Germany  
JARA-HPC, RWTH Aachen University and Forschungszentrum Jülich GmbH, 52056 Aachen, Germany

### Dependence of the lattice constant on $U_{\text{eff}}$

The equilibrium lattice constant  $a_0$  was determined for varying values of  $U_{\text{eff}}$  for the PBE and PBEsol functional as shown in Fig. S4.

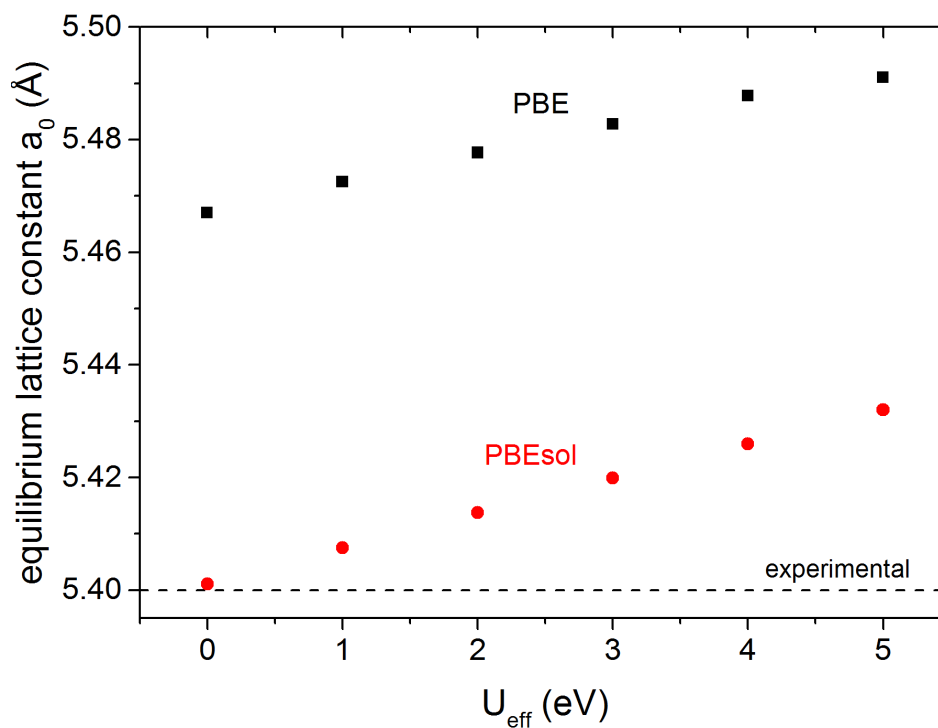

Fig. S1: Dependence of the calculated equilibrium lattice constant on the effective  $U$ -parameter.

### Birch-Murnaghan equation of state fits for defective cells

Supercells with different defects were calculated with the GGA functionals PBE and PBEsol and the hybrid functional HSE06. For the GGA functionals a Hubbard  $U$ -parameter of  $U_{eff} = 5$  eV was introduced for the  $4f$ -orbitals of cerium in the simplified rotational invariant approach. The energy-volume relationship was fitted by a Birch-Murnaghan equation of state:

$$E = E_0 + \frac{9V_0B}{16} \left\{ \left[ \left( \frac{V_0}{V} \right)^{2/3} - 1 \right]^3 B' + \left[ \left( \frac{V_0}{V} \right)^{2/3} - 1 \right]^2 \left[ 6 - 4 \left( \frac{V_0}{V} \right)^{2/3} \right] \right\}$$

The results for the cells, calculated with the three functionals, are given in the following.

PBE

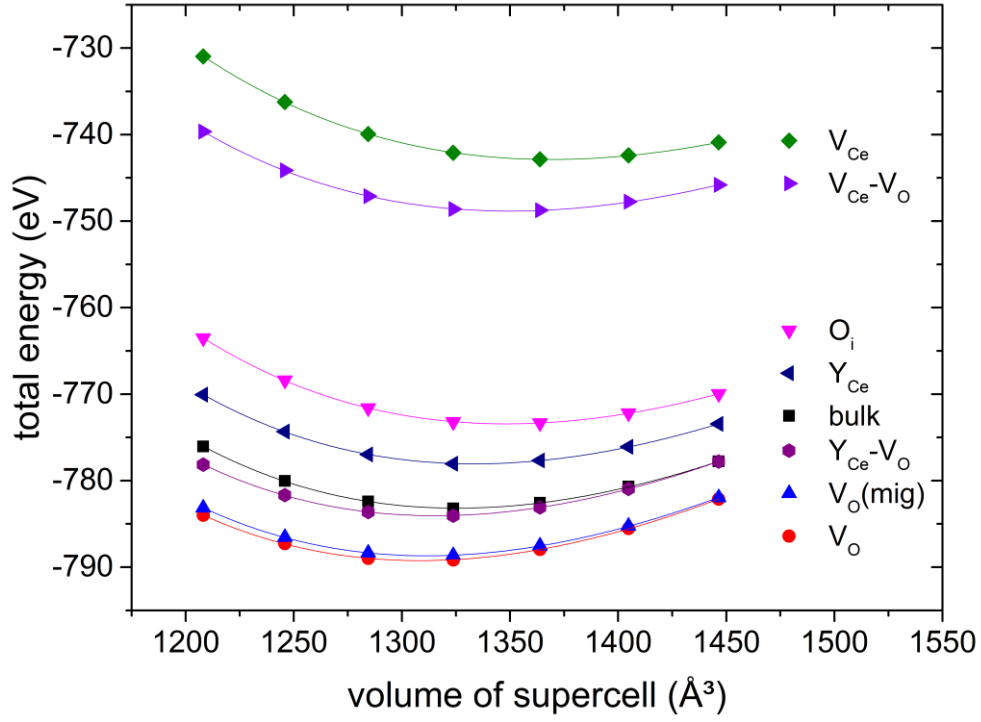

Fig. S2: Energy-volume relationship for supercells calculated with PBE.

Table S1: Parameters obtained from the equation of state fit for the supercells calculated with PBE.

| cell                                                         | $E_0$ (eV)         | $V_0$ ( $\text{\AA}^3$ ) | $B$ (eV/ $\text{\AA}^3$ ) | $B'$ (-)        |
|--------------------------------------------------------------|--------------------|--------------------------|---------------------------|-----------------|
| bulk                                                         | $-783.18 \pm 0.02$ | $1325.51 \pm 0.51$       | $1.16 \pm 0.01$           | $4.65 \pm 0.34$ |
| $V_{\text{O}}^{\ddot{\circ}}$                                | $-789.24 \pm 0.02$ | $1308.22 \pm 0.49$       | $1.18 \pm 0.01$           | $4.70 \pm 0.34$ |
| $V_{\text{O}}^{\ddot{\circ}}(\text{mig})$                    | $-788.68 \pm 0.02$ | $1311.39 \pm 0.51$       | $1.17 \pm 0.01$           | $4.72 \pm 0.35$ |
| $O_i^{\ddot{\circ}}$                                         | $-773.43 \pm 0.02$ | $1348.26 \pm 0.46$       | $1.11 \pm 0.01$           | $4.67 \pm 0.35$ |
| $V_{\text{Ce}}^{\ddot{\circ}}$                               | $-742.87 \pm 0.02$ | $1369.02 \pm 0.40$       | $1.00 \pm 0.01$           | $4.57 \pm 0.35$ |
| $Y_{\text{Ce}}^{\ddot{\circ}}$                               | $-778.05 \pm 0.02$ | $1333.58 \pm 0.50$       | $1.13 \pm 0.01$           | $4.65 \pm 0.35$ |
| $V_{\text{Ce}}^{\ddot{\circ}} - V_{\text{O}}^{\ddot{\circ}}$ | $-748.83 \pm 0.03$ | $1349.66 \pm 0.55$       | $1.00 \pm 0.01$           | $4.85 \pm 0.43$ |
| $Y_{\text{Ce}}^{\ddot{\circ}} - V_{\text{O}}^{\ddot{\circ}}$ | $-784.05 \pm 0.02$ | $1315.39 \pm 0.52$       | $1.15 \pm 0.01$           | $4.73 \pm 0.35$ |

PBEsol

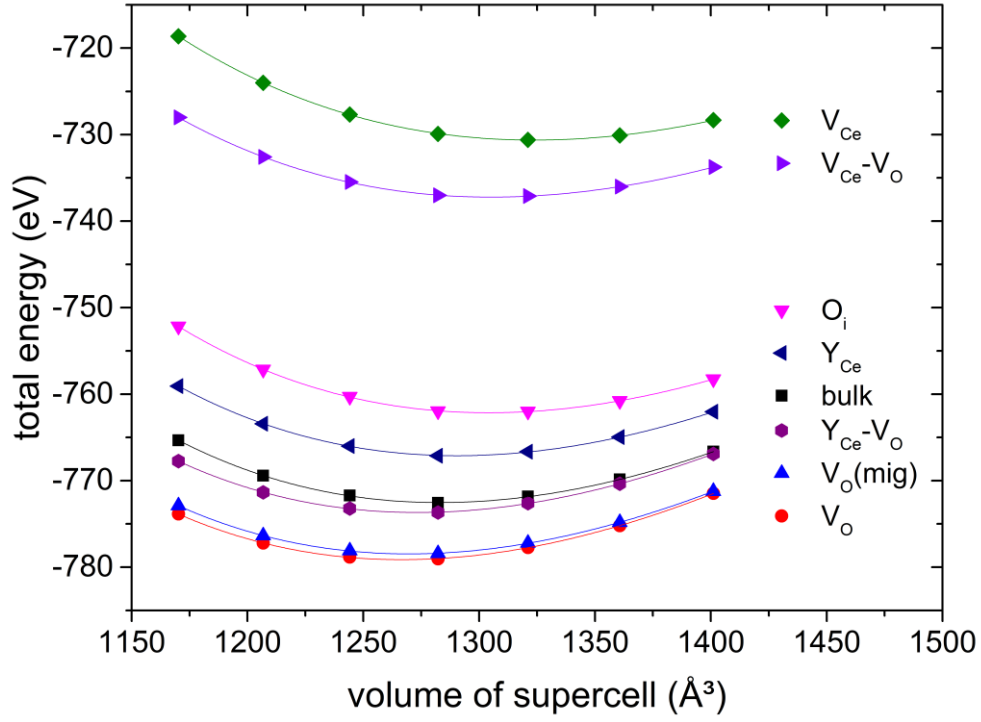

Fig. S3: Energy-volume relationship for supercells calculated with PBEsol.

Table S2: Parameters obtained from the equation of state fit for the supercells calculated with PBEsol.

| cell                                                         | $E_0$ (eV)         | $V_0$ ( $\text{\AA}^3$ ) | $B$ (eV/ $\text{\AA}^3$ ) | $B'$ (-)        |
|--------------------------------------------------------------|--------------------|--------------------------|---------------------------|-----------------|
| bulk                                                         | $-772.53 \pm 0.02$ | $1282.98 \pm 0.46$       | $1.25 \pm 0.01$           | $3.91 \pm 0.32$ |
| $V_{\text{O}}^{\ddot{\cdot}}$                                | $-779.13 \pm 0.02$ | $1266.52 \pm 0.45$       | $1.26 \pm 0.01$           | $3.94 \pm 0.33$ |
| $V_{\text{O}}^{\ddot{\cdot}}(\text{mig})$                    | $-778.46 \pm 0.02$ | $1269.60 \pm 0.46$       | $1.25 \pm 0.01$           | $3.94 \pm 0.33$ |
| $O_i^{\ddot{\cdot}}$                                         | $-762.15 \pm 0.02$ | $1304.21 \pm 0.42$       | $1.22 \pm 0.01$           | $3.92 \pm 0.32$ |
| $V_{\text{Ce}}^{\ddot{\cdot}}$                               | $-730.63 \pm 0.02$ | $1323.68 \pm 0.37$       | $1.11 \pm 0.01$           | $3.80 \pm 0.33$ |
| $Y_{\text{Ce}}^{\ddot{\cdot}}$                               | $-767.11 \pm 0.02$ | $1290.53 \pm 0.45$       | $1.22 \pm 0.01$           | $3.90 \pm 0.32$ |
| $V_{\text{Ce}}^{\ddot{\cdot}} - V_{\text{O}}^{\ddot{\cdot}}$ | $-737.22 \pm 0.02$ | $1305.26 \pm 0.44$       | $1.10 \pm 0.01$           | $3.86 \pm 0.34$ |
| $Y_{\text{Ce}}^{\ddot{\cdot}} - V_{\text{O}}^{\ddot{\cdot}}$ | $-773.68 \pm 0.02$ | $1273.31 \pm 0.46$       | $1.24 \pm 0.01$           | $3.95 \pm 0.32$ |

HSE06

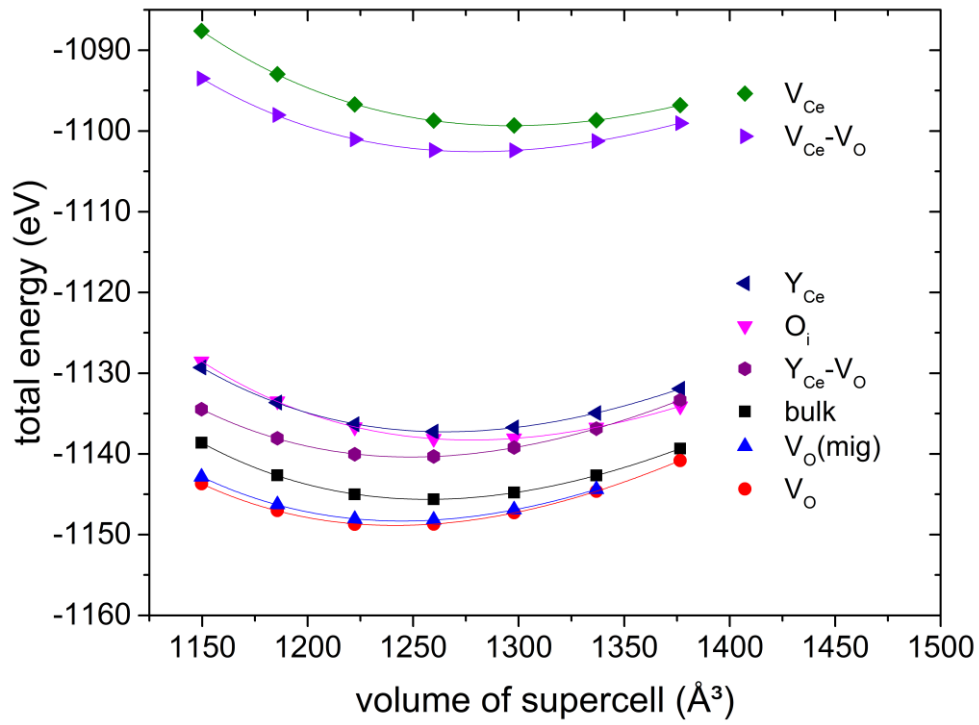

Fig. S4: Energy-volume relationship for supercells calculated with HSE06.

Table S3: Parameters obtained from the equation of state fit for the supercells calculated with HSE06.

| cell                                                         | $E_0$ (eV)          | $V_0$ ( $\text{\AA}^3$ ) | $B$ (eV/ $\text{\AA}^3$ ) | $B'$ (-)        |
|--------------------------------------------------------------|---------------------|--------------------------|---------------------------|-----------------|
| bulk                                                         | $-1145.62 \pm 0.02$ | $1256.91 \pm 0.53$       | $1.30 \pm 0.01$           | $4.49 \pm 0.37$ |
| $V_{\text{O}}^{\ddot{\cdot}}$                                | $-1148.86 \pm 0.02$ | $1241.45 \pm 0.50$       | $1.32 \pm 0.01$           | $4.54 \pm 0.37$ |
| $V_{\text{O}}^{\ddot{\cdot}}(\text{mig})$                    | $-1148.30 \pm 0.03$ | $1244.56 \pm 0.82$       | $1.31 \pm 0.02$           | $4.53 \pm 0.82$ |
| $O_i^{\ddot{\cdot}}$                                         | $-1138.27 \pm 0.03$ | $1277.64 \pm 0.50$       | $1.25 \pm 0.01$           | $4.52 \pm 0.38$ |
| $V_{\text{Ce}}^{\ddot{\cdot}}$                               | $-1099.35 \pm 0.03$ | $1296.35 \pm 0.44$       | $1.14 \pm 0.02$           | $4.39 \pm 0.39$ |
| $Y_{\text{Ce}}^{\ddot{\cdot}}$                               | $-1137.25 \pm 0.02$ | $1265.12 \pm 0.52$       | $1.27 \pm 0.01$           | $4.54 \pm 0.37$ |
| $V_{\text{Ce}}^{\ddot{\cdot}} - V_{\text{O}}^{\ddot{\cdot}}$ | $-1102.56 \pm 0.03$ | $1279.58 \pm 0.58$       | $1.11 \pm 0.01$           | $4.97 \pm 0.46$ |
| $Y_{\text{Ce}}^{\ddot{\cdot}} - V_{\text{O}}^{\ddot{\cdot}}$ | $-1140.38 \pm 0.02$ | $1248.84 \pm 0.52$       | $1.29 \pm 0.01$           | $4.55 \pm 0.38$ |

### Defect formation and interaction with $U_{\text{eff}}=0$

For comparison, energies of formation and defect interaction were calculated for the PBE functional without  $U$ -parameter.

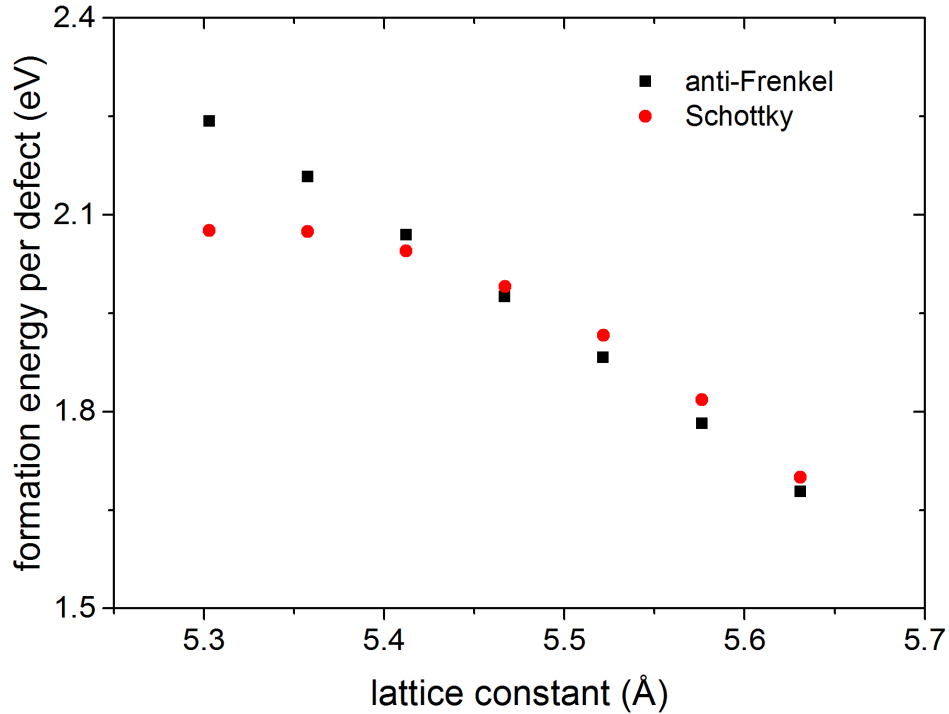

Fig. S5: Energy of defect formation for anti-Frenkel and Schottky disorder per defect for the PBE functional with  $U_{\text{eff}}=0$ .

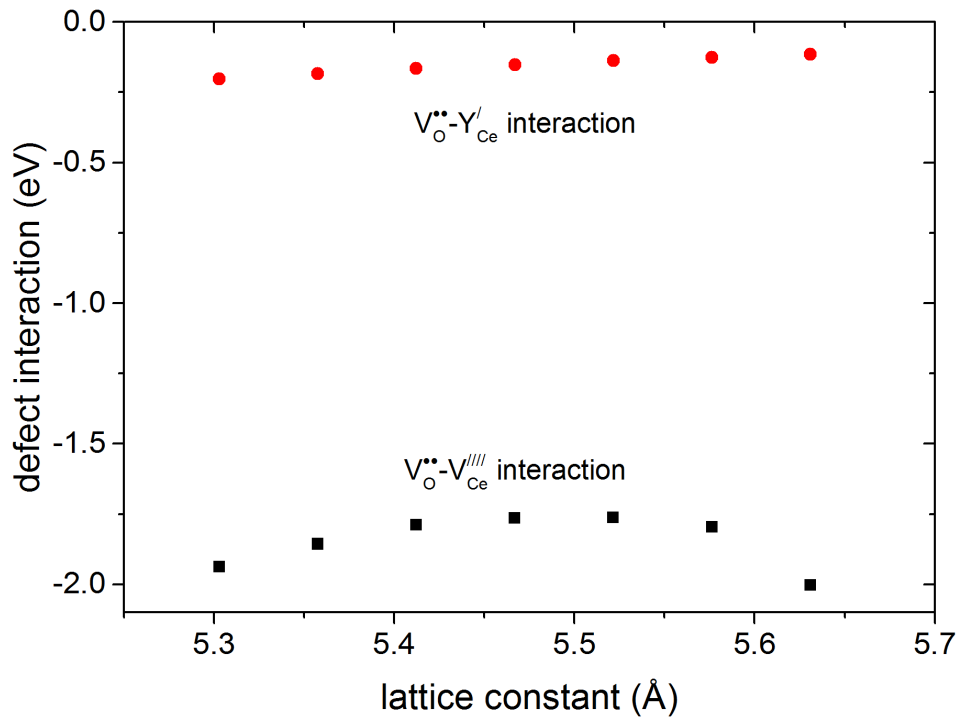

Fig. S6: Interaction energy between Y-dopant and oxygen vacancy as well as cerium vacancy and oxygen vacancy for the PBE functional with  $U_{\text{eff}}=0$ .

## Relation between lattice constant and defect energy

The calculated defect energies as function of the lattice constant where fitted by linear or parabolic functions depending on the curve form. Results are given in

**Table 4: Relation between defect energy  $\Delta E$  and lattice constant  $x$  fitted by the expression  $\Delta E = a + b \cdot x$ .**

|                          | PBE    |          | PBEsol |          | HSE06  |          |
|--------------------------|--------|----------|--------|----------|--------|----------|
|                          | a (eV) | b (eV/Å) | a (eV) | b (eV/Å) | a (eV) | b (eV/Å) |
| $\Delta E_{\text{aF}}$   | 13.10  | -2.00    | 13.01  | -2.00    | 14.62  | -2.29    |
| $\Delta E_{\text{Y-VO}}$ | -4.99  | 0.85     | -5.03  | 0.86     | -5.64  | 1.00     |
| $\Delta E_{\text{mig}}$  | 11.81  | -2.06    | 12.33  | -2.16    | 12.96  | -2.31    |

**Table 5: Relation between defect energy  $\Delta E$  and lattice constant  $x$  fitted by the expression  $\Delta E = a + b \cdot x + c \cdot x^2$ .**

|                                             | PBE     |          |                        | PBEsol  |          |                        | HSE06   |          |                        |
|---------------------------------------------|---------|----------|------------------------|---------|----------|------------------------|---------|----------|------------------------|
|                                             | a (eV)  | b (eV/Å) | c (eV/Å <sup>2</sup> ) | a (eV)  | b (eV/Å) | c (eV/Å <sup>2</sup> ) | a (eV)  | b (eV/Å) | c (eV/Å <sup>2</sup> ) |
| $\Delta E_{\text{Sch}}$                     | -110.53 | 42.93    | -4.07                  | -118.17 | 46.31    | -4.43                  | -112.34 | 44.72    | -4.35                  |
| $\Delta E_{\text{V}_{\text{Ce}}-\text{VO}}$ | -152.45 | 54.10    | -4.87                  | -143.97 | 50.71    | -4.53                  | -227.99 | 81.65    | -7.38                  |
